# Supplementary material
Source: Copernicus journal article supplement (doi:10.5194/acp-26-6521-2026)
Supplement: Supplementary file 1 [file acp-26-6521-2026-supplement.pdf]

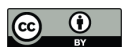

*Supplement of*

## **Ventilation and low pollution enhancing new particle formation in Milan, Italy**

**Myriam Agrò et al.**

*Correspondence to:* Myriam Agrò ([myriam.agro@helsinki.fi](mailto:myriam.agro@helsinki.fi)) and Federico Bianchi ([federico.bianchi@helsinki.fi](mailto:federico.bianchi@helsinki.fi))

The copyright of individual parts of the supplement might differ from the article licence.

## 2 Maps for the model simulation

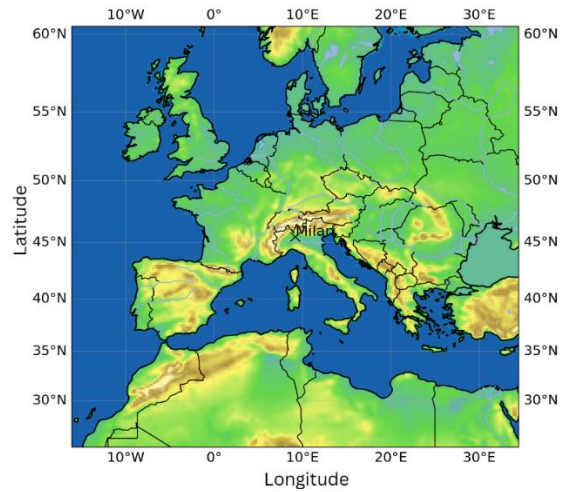

3  
4 **Figure S1: Domain for the WRF and FLEXPART simulation (spatial resolution of  $18 \times 18 \text{ km}^2$ ).**

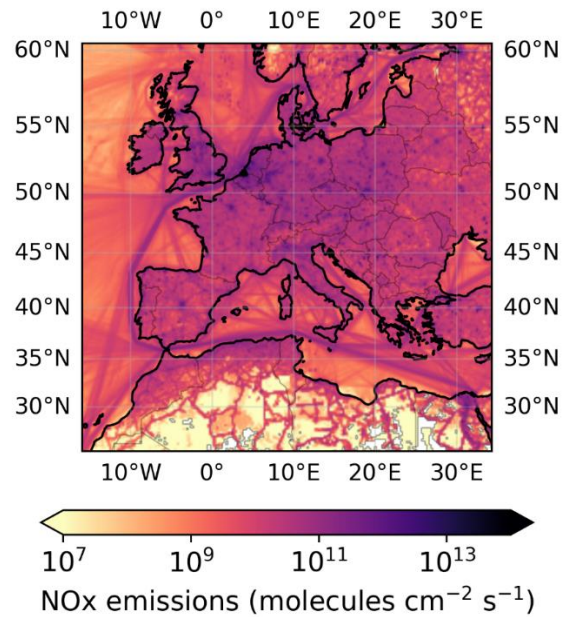

5  
6 **Figure S2: Map of NO<sub>x</sub> emissions.**

7

## 8 Discussion on the uncertainty of the growth and formation rates estimation

9 To assess the uncertainty associated with our method for the estimation of the growth and formation rates, we computed the  
10 GR for those days when a clear growth pattern was visible and when all the instruments were measuring simultaneously  
11 using the maximum concentration method (Kulmala et al., 2012). The number of days with these characteristics was 9 for  
12 the calculation of GR<sub>3-7</sub> and GR<sub>7-20</sub>, and 7 for GR<sub>20-100</sub>.

13 For clarity, in this discussion, the original method described in the article, and using the average size distributions of the days  
14 with NPF rank above the 80<sup>th</sup> percentile, is defined as **method 1**. The alternative method, consisting of the day-by-day  
15 estimation of the GR, is referred to as **method 2**. The GR and J calculated with the two approaches are reported in Fig. S3.  
16 Although GR<sub>3-7</sub> and GR<sub>7-20</sub> calculated with method 1 do not fall within the interquartile range of those calculated with  
17 method 2 (Fig. S3a), the limited amount of data points included in the boxplot could potentially create a bias in the  
18 comparison.

19 The J values obtained with the two methods remained very similar (Fig. S3b). A day-by-day comparison showed that the  
20 relative differences in the estimated J values were always below 10%, with the exception of four cases, which still remained  
21 below 21%.

22

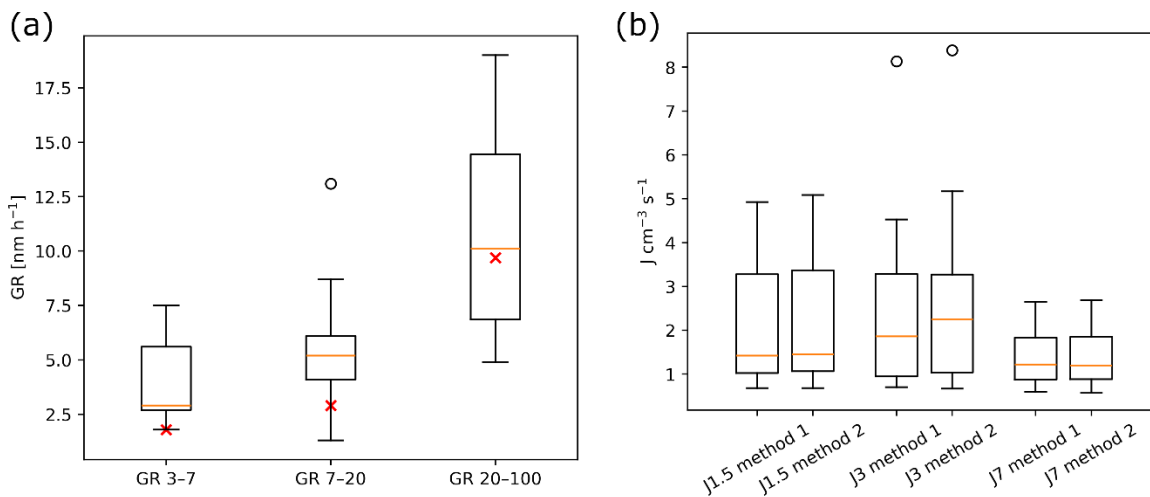

23

24 **Figure S3: a) Boxplots representing the GR estimated using method 2, compared to the GR calculated using method 1 (in red x**  
25 **marks); b) comparison between formation rates calculated using the GR from method 1 and 2. The boxplots include only the days**  
26 **when the estimation of GR (and therefore J) with method 2 was possible. For the description of the boxplots, refer to Fig. 4b.**

27 **NPF analysis**

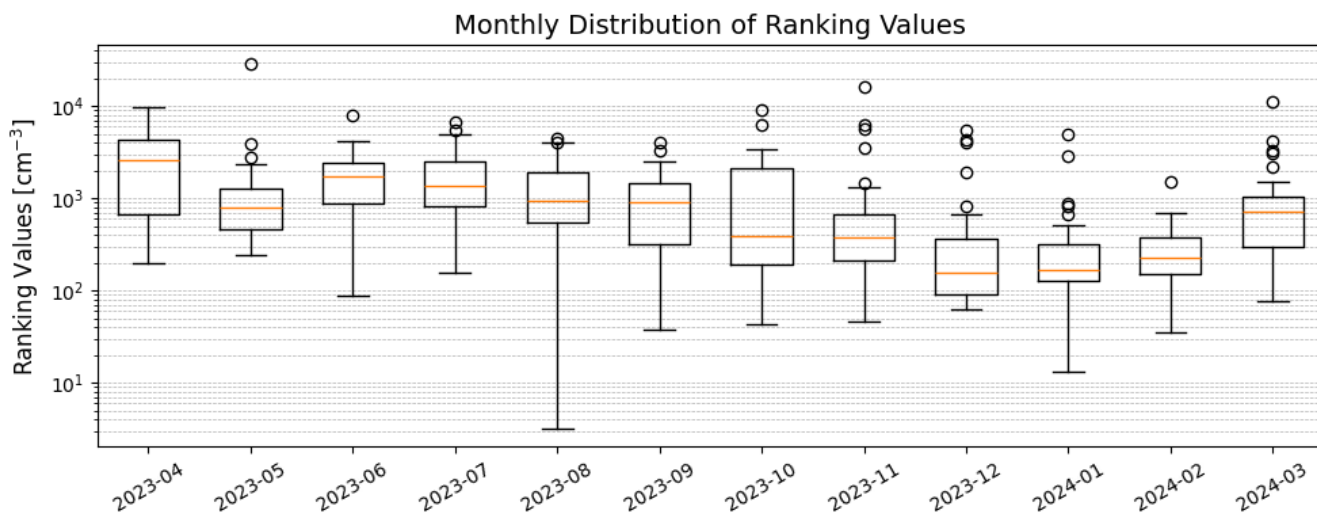

28

29 **Figure S4: Monthly distribution of the ranking values. For the explanation of the boxplots, refer to Fig. 4b.**

30

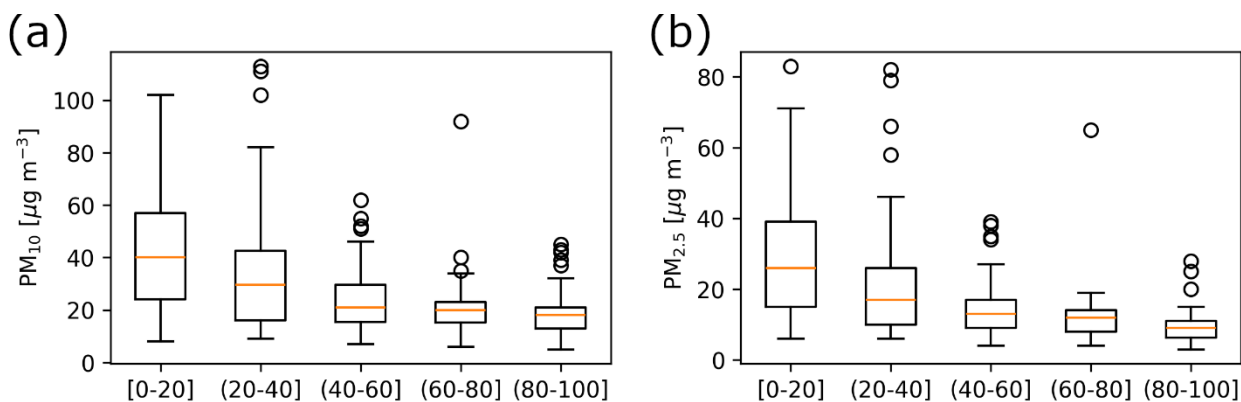

31

32 **Figure S5: a) Daily PM<sub>10</sub> and b) PM<sub>2.5</sub> per rank class. For the description of the boxplots, refer to Fig. 4b.**

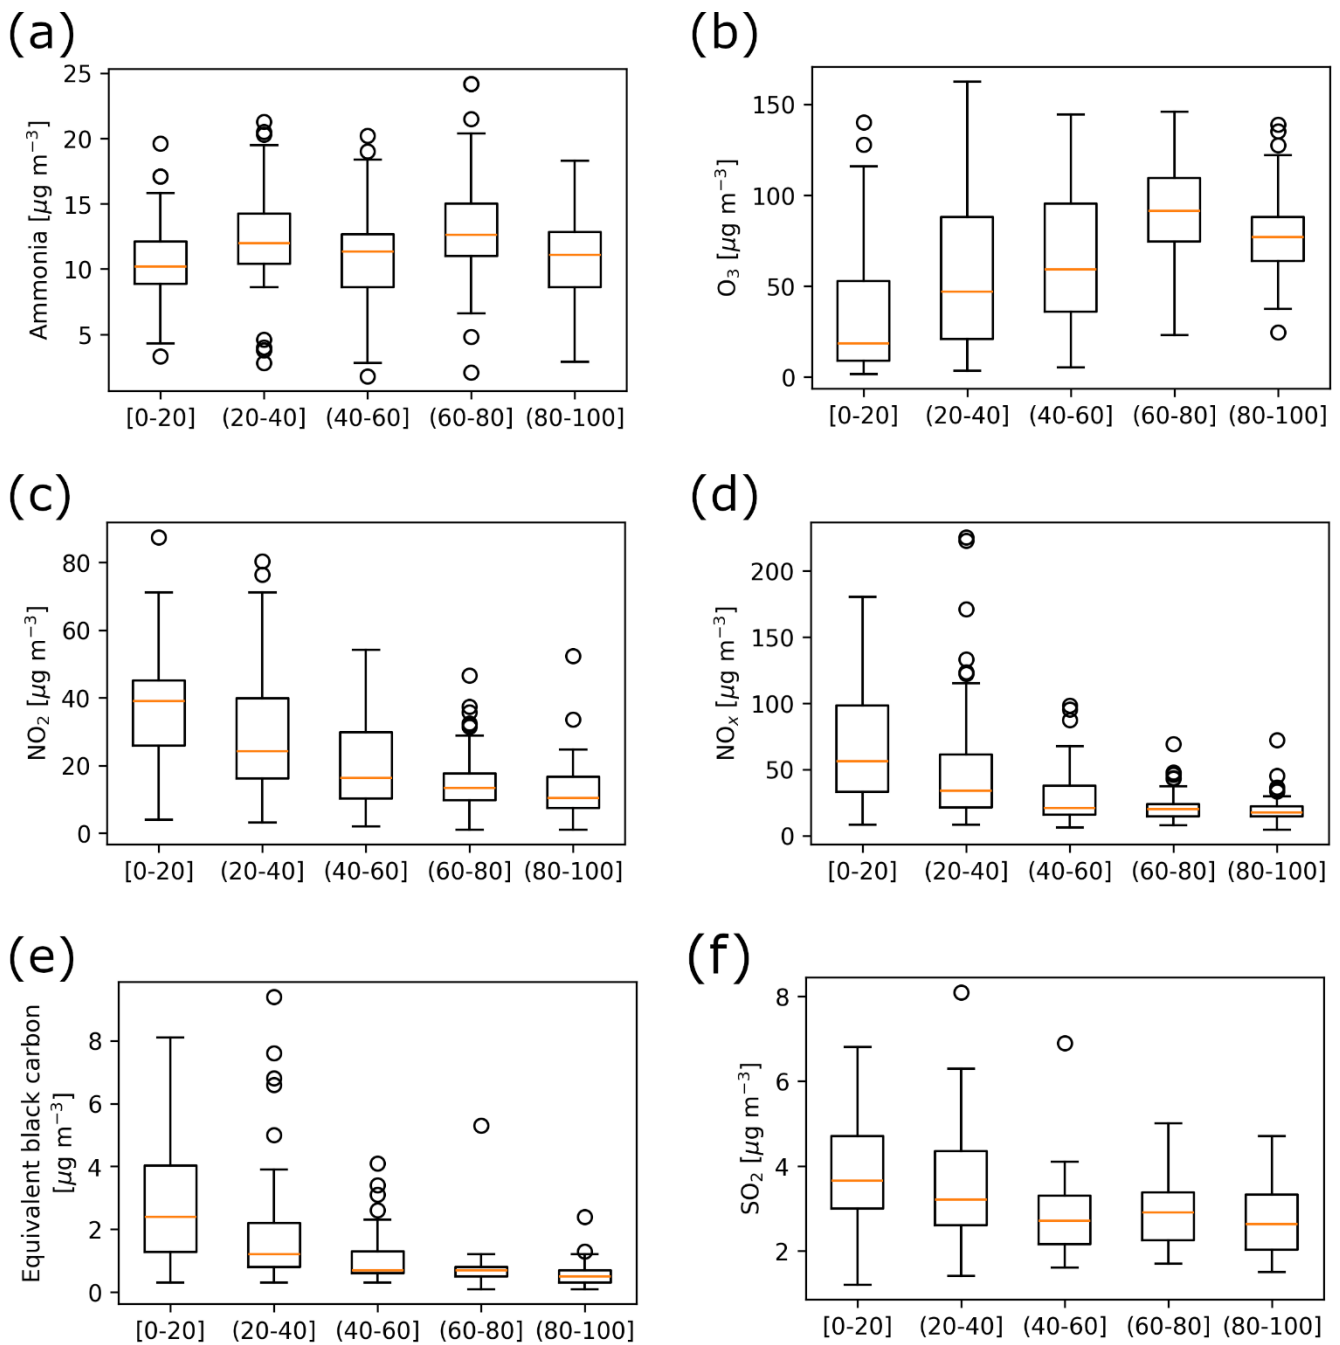

33

34

35 **Figure S6: Daily median of a) ammonia, b) O<sub>3</sub>, c) NO<sub>2</sub>, d) NO<sub>x</sub>, e) equivalent black carbon, and f) SO<sub>2</sub> concentration during the**  
 36 **active window per rank class. For the explanation of the boxplots, refer to Fig. 4b.**

37

38

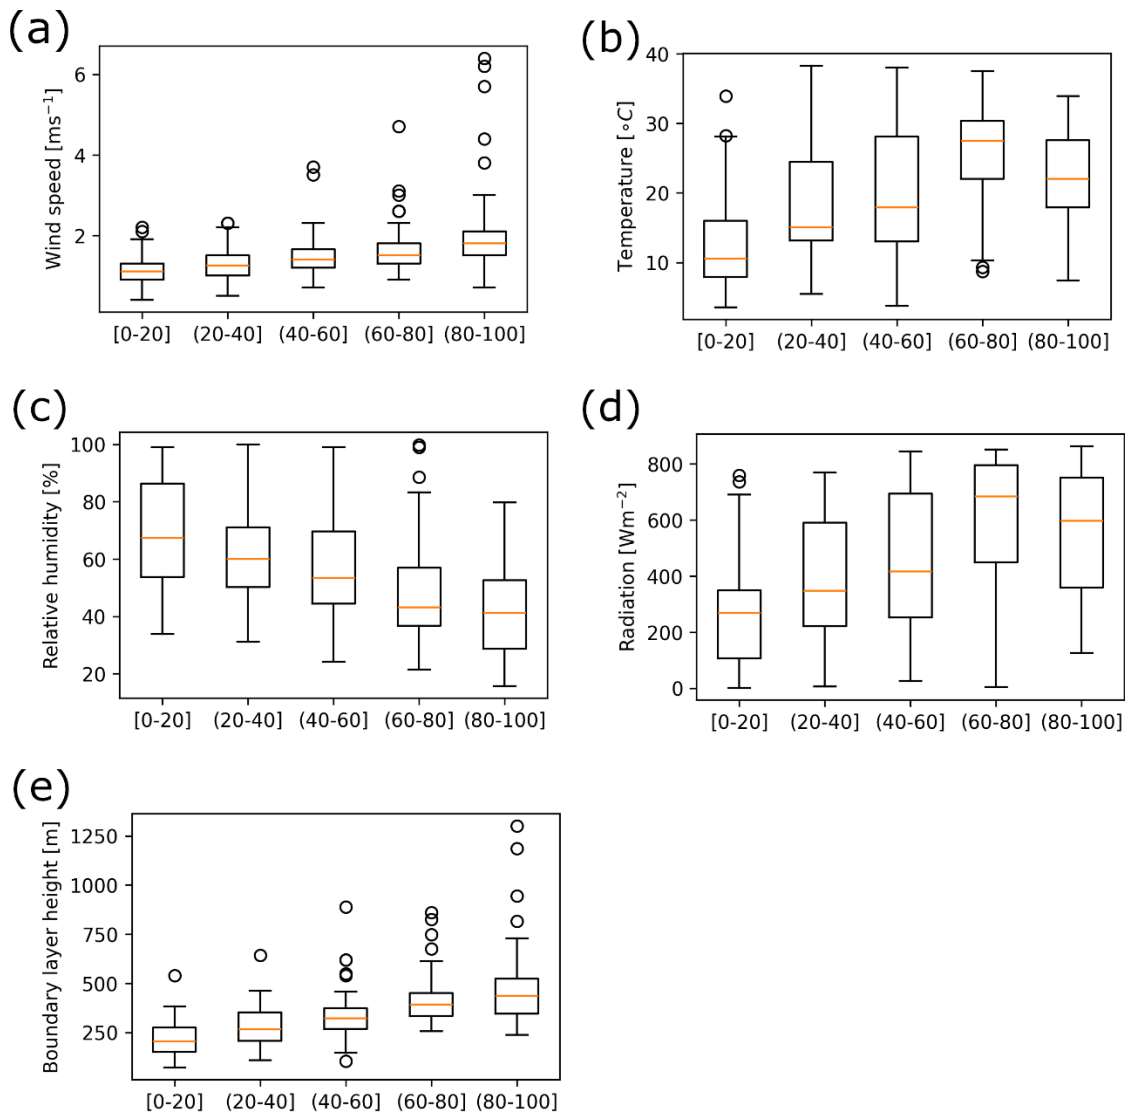

39

40 **Figure S7: Daily median of a) wind speed, b) temperature, c) relative humidity, d) radiation, and e) boundary layer height during**  
 41 **the active window per rank class. For the explanation of the boxplots, refer to Fig. 4b.**

42

43

44

45

46

## 47 Sulfuric acid proxy analysis

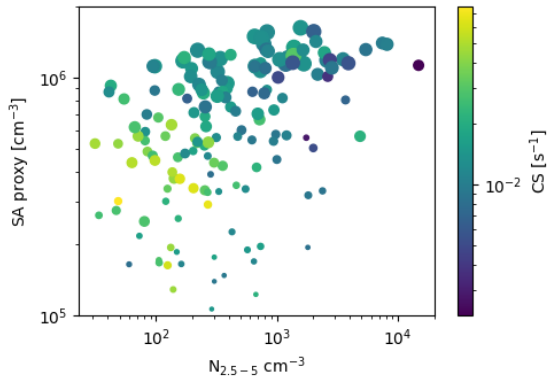

48

49 **Figure S8: Relation between CS, sulfuric acid (SA) proxy, and  $N_{2.5-5}$ . The size of the dots represents the radiation. Each point**  
50 **corresponds to the daily median over the active time window.**

51

52

53

54

## 55 NPF drivers in different atmospheric regimes

56 To assess the characteristics of the NPF drivers in different atmospheric regimes, the dataset was first separated  
57 into stagnant and non-stagnant days using the threshold set by ARPA Lombardia of  $VI=400 \text{ m}^2 \text{ s}^{-1}$ . Then the  
58 nano-particle ranking method was applied to each of the two subsets and the variables CS, formation rates,  $\text{SO}_2$   
59 concentration, and sulfuric acid proxy were analyzed in relation to NPF ranks. Finally, the full dataset was  
60 divided into seasons and the same analysis was performed.

61 The results obtained for the stagnant vs. non-stagnant analysis are reported in Fig. S9.

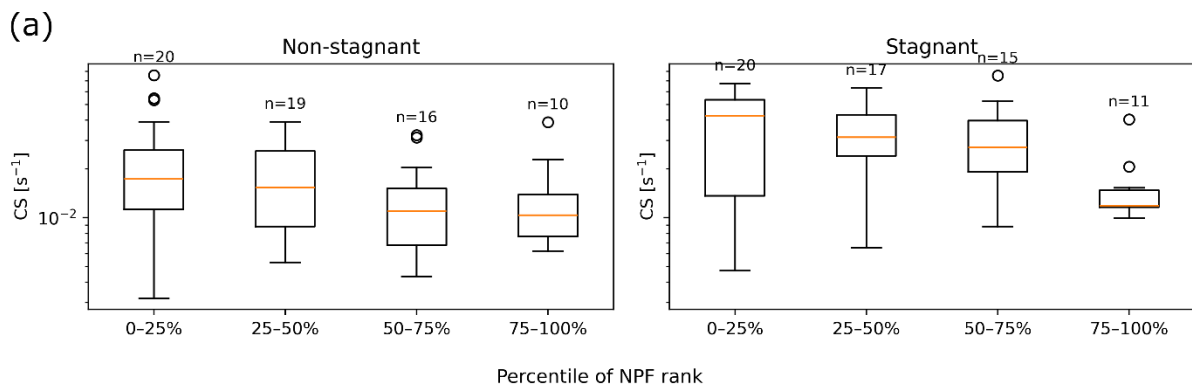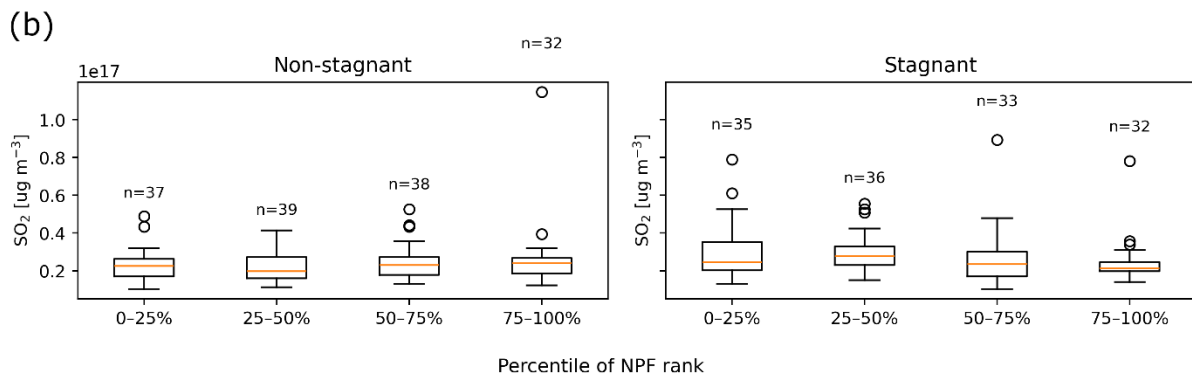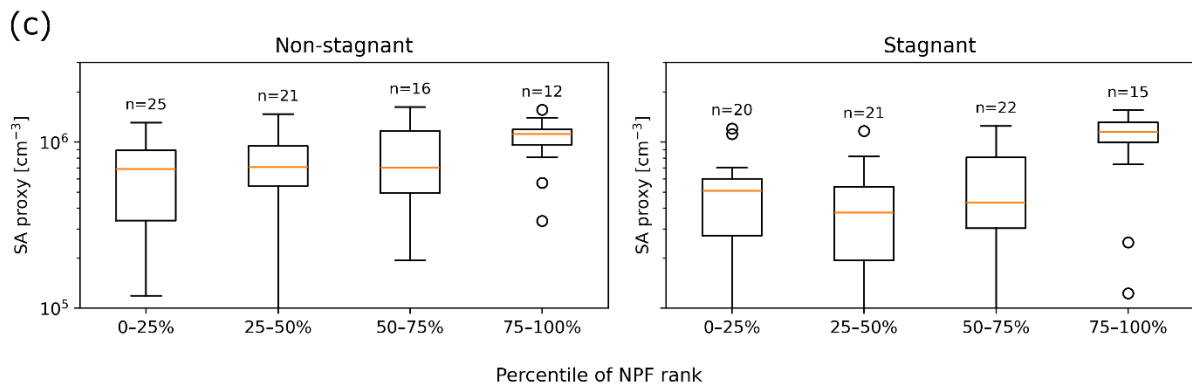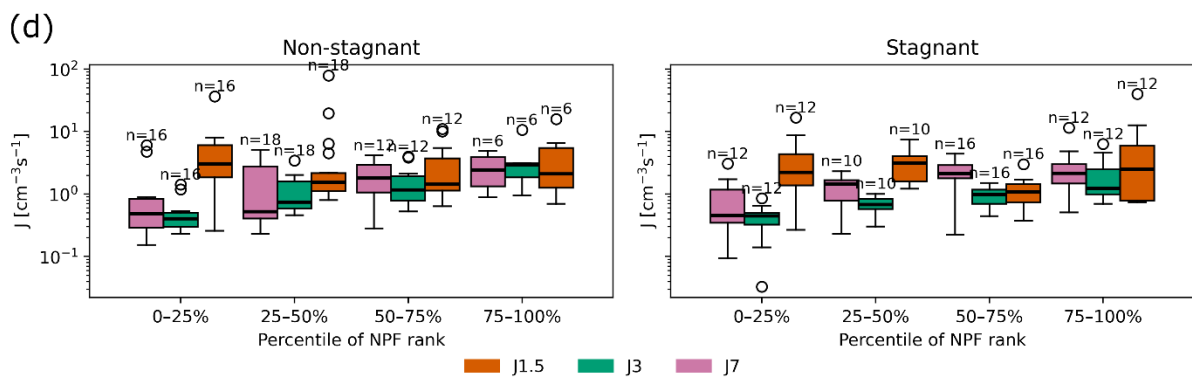

63 **Figure S9: Daily a) median CS, b) median SO<sub>2</sub>, c) median SA proxy calculated over the active time window of each day per rank**  
 64 **class during stagnant and non-stagnant conditions; d) daily maximum J<sub>1.5</sub>, J<sub>3</sub>, and J<sub>7</sub> during the active window of each day, per**  
 65 **rank class during stagnant and non-stagnant conditions. *n* indicates the number of datapoints included in the boxplot. For the**  
 66 **description of the boxplot, see Fig. 4b.**

67  
 68 The NPF intensities (concentration of 2.5-5 nm particles) were overall higher during non-stagnant conditions  
 69 (Fig. S10):

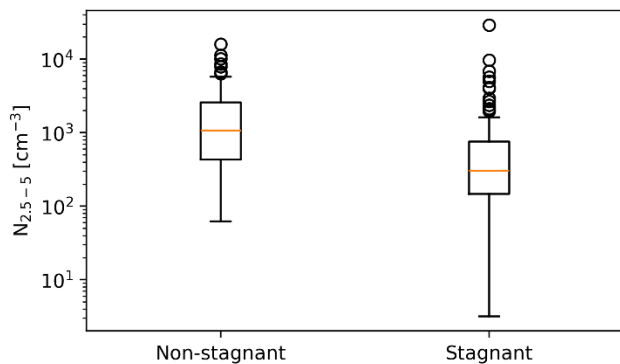

70  
 71 **Figure S10: N<sub>2.5-5</sub>, representing NPF intensity, as explained in Sect. 2.4.1, during stagnant and non-stagnant conditions. Boxplots**  
 72 **are defined as in Fig. 4b.**

73  
 74 Seasonal effects may further bias this analysis as stagnant days were recorded more frequently during autumn and  
 75 winter, while non-stagnant days were more common in summer and spring (Tab. S1):

|        | Stagnant | Non-stagnant |
|--------|----------|--------------|
| Autumn | 42       | 31           |
| Spring | 18       | 66           |
| Summer | 22       | 60           |
| Winter | 65       | 24           |

76 **Table S1: Number of stagnant and non-stagnant days per season.**

77 The results from the seasonal analysis are reported in Fig. S11:

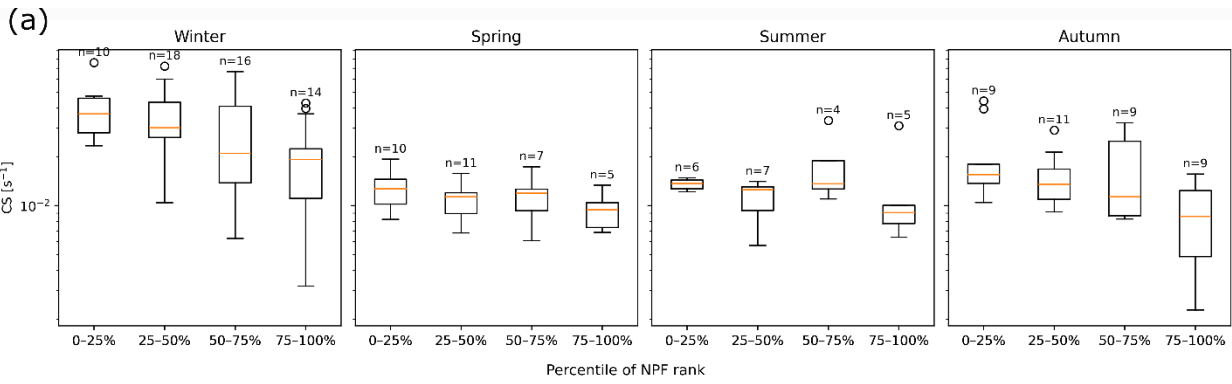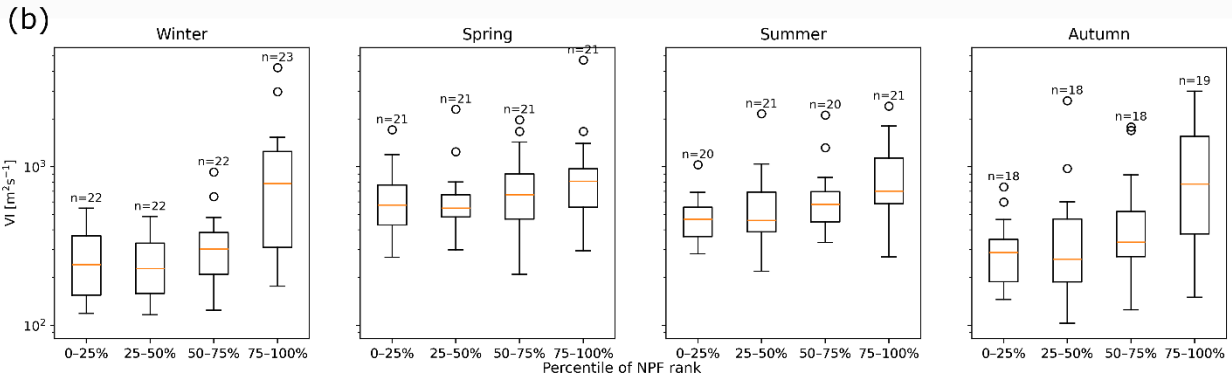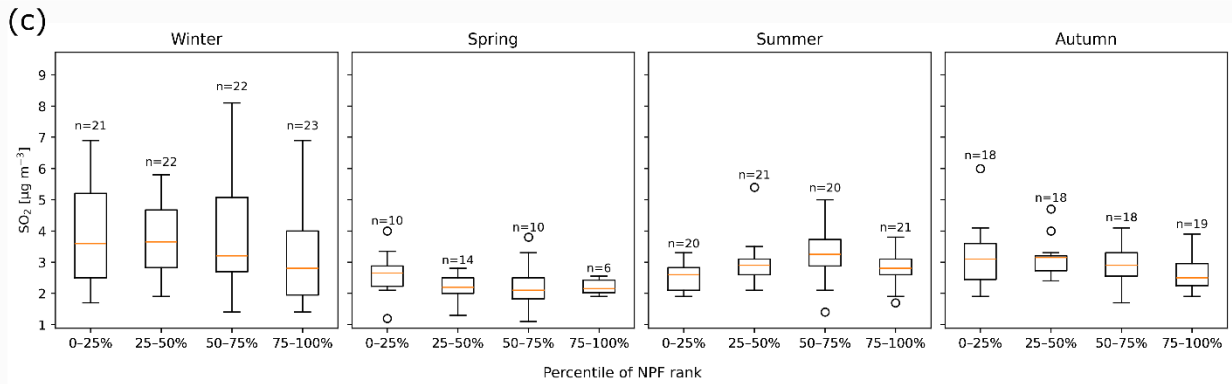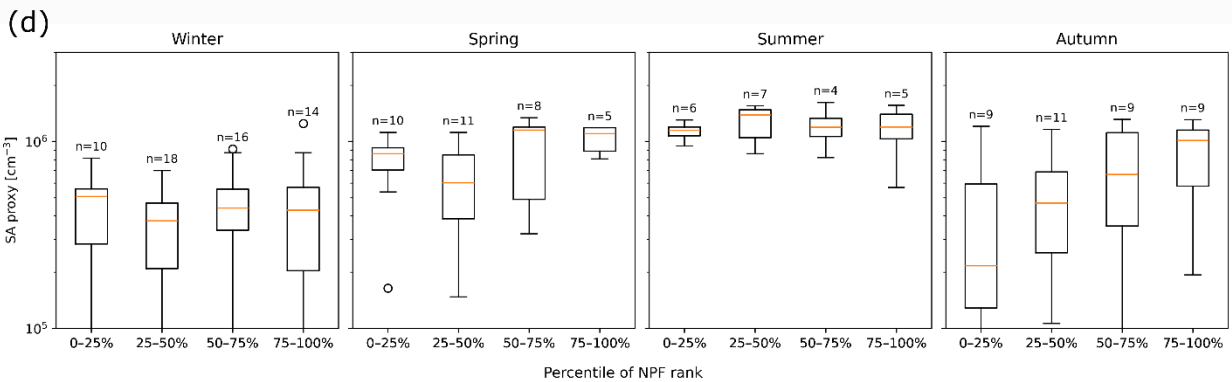

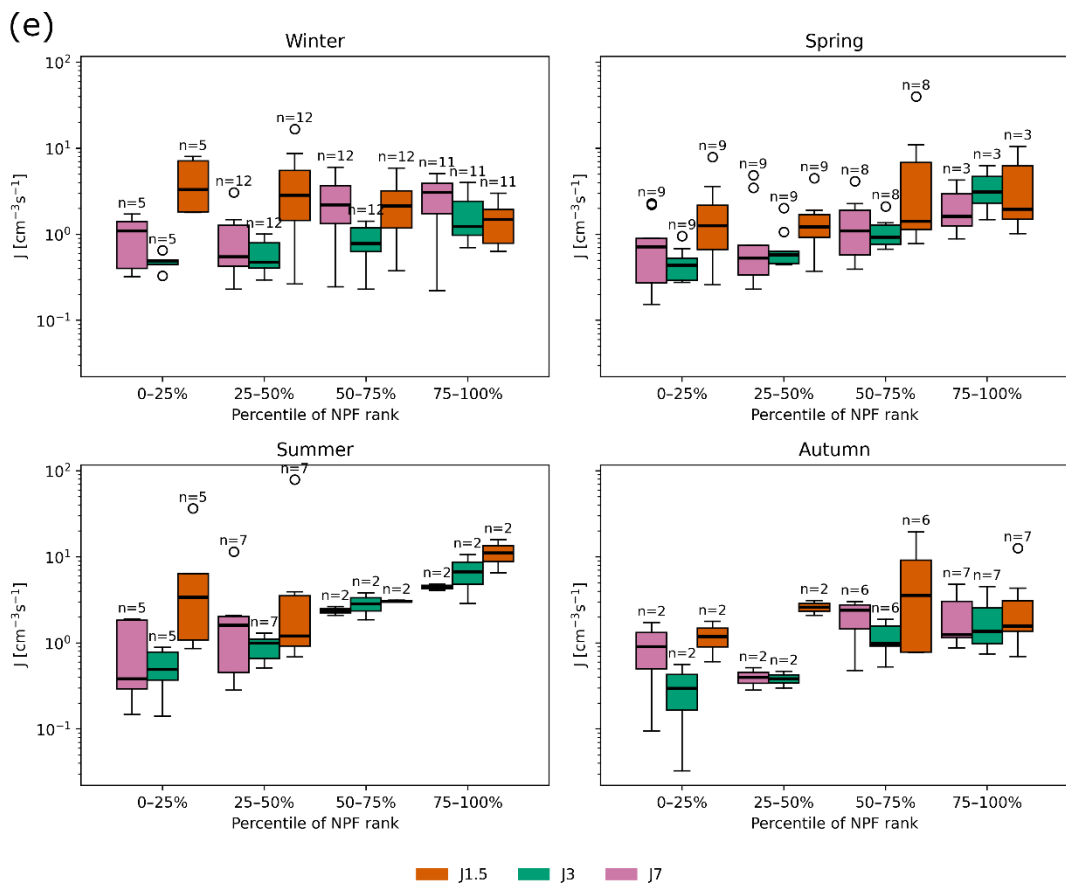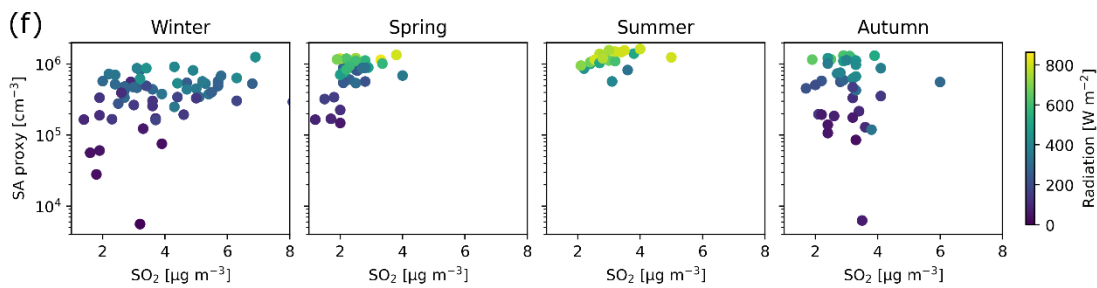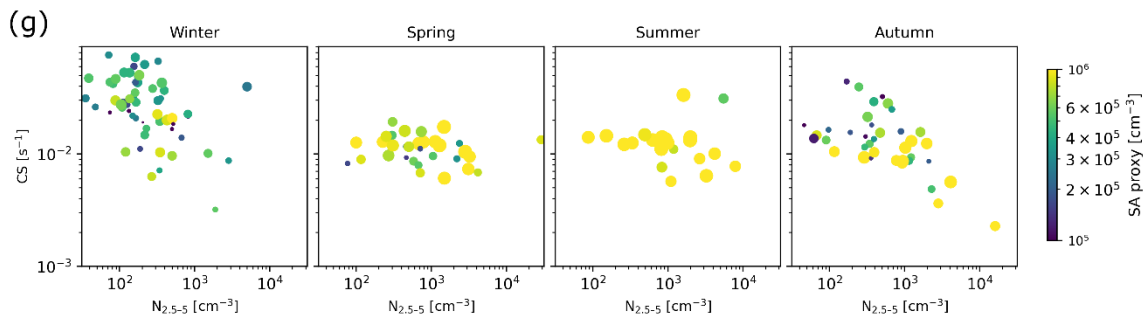

80

81 **Figure S11: Daily a) median CS, c) median SO<sub>2</sub>, d) median SA proxy calculated over the active time window of each day, per rank**  
82 **class in different seasons; b) daily VI per rank class in different seasons; e) daily maximum J<sub>1.5</sub>, J<sub>3</sub>, and J<sub>7</sub> during the active**  
83 **window of each day, per rank class in different seasons. *n* indicates the number of datapoints included in the boxplot. For the**  
84 **description of the boxplot, see Fig. 4b; f) relation between the daily median SA proxy, radiation, and SO<sub>2</sub> calculated over the active**  
85 **time window in different seasons; g) relation between the daily median CS, N<sub>2.5-5</sub>, SA proxy, and radiation (size of the dots)**  
86 **calculated over the active time window in different seasons.**

87
